# Supplementary material for: Lipid mediator class switching during acute inflammation: signals in resolution
Source: Springer Nature journal article supplement (doi:10.1038/89759), 2001-07-01
Supplement: 41590_2001_BFni0701_612_MOESM5_ESM.pdf [file 41590_2001_BFni0701_612_MOESM5_ESM.pdf]

**Web Table 1. PGE<sub>2</sub> induces PMN 15(S)-HETE formation from endogenous arachidonate**

---

| <b>First exposure</b>     | <b>Second exposure</b> | <b>15(S)-HETE</b> |
|---------------------------|------------------------|-------------------|
| PGE <sub>2</sub> (0 nM)   | fMLP                   | 0.08 ng           |
| PGE <sub>2</sub> (3 nM)   | fMLP                   | 0.17 ng           |
| PGE <sub>2</sub> (300 nM) | fMLP                   | 0.28 ng           |

---

Human PMNs ( $25 \times 10^6$  cells/ml) were exposed to PGE<sub>2</sub> (0–300 nM) for 5 h at 37 °C. After a 5-min treatment with adenosine deaminase (30 mU), cells were stimulated with fMLP (100 nM) for 15 min at 37 °C. Values are from a representative concentration response using cells from a single blood donor.
